# Supplementary material
Source: PubMed Central journal article supplement (PMC2278212)
Supplement: pnas_0712223105_2.pdf [file pnas_0712223105_2.pdf]

**Table 3. Effective sizes of the different brown bear populations estimated after maximum of likelihood and Bayesian analyses**

| <b>L, nt</b> | <b>Population</b>   | <b><math>\Theta_{MLE}</math></b> | <b>Ne (<math>\mu = 10\%</math><br/>subst./MY)</b> | <b>Ne (<math>\mu = 29,8\%</math><br/>subst./MY)</b> | <b><math>\Theta_{MPE}</math></b> | <b>Ne (<math>\mu = 10\%</math><br/>subst./MY)</b> | <b>Ne (<math>\mu = 29,8\%</math><br/>subst./MY)</b> |
|--------------|---------------------|----------------------------------|---------------------------------------------------|-----------------------------------------------------|----------------------------------|---------------------------------------------------|-----------------------------------------------------|
| <b>Long</b>  |                     |                                  |                                                   |                                                     |                                  |                                                   |                                                     |
| 176          | Spain. present      | 0.0083 (2.4%)                    | 3303 [1352-7528]                                  | 1108 [454-2526]                                     | 0.0072 (20%)                     | 2885 [1109-6848]                                  | 968 [372-2298]                                      |
| 177          | Spain. holocene     | 0.0236 (6.3%)                    | 9453 [3485-27642]                                 | 3172 [1170-9276]                                    | 0.0200 (69%)                     | 8012 [3437-26108]                                 | 2689 [1153-8761]                                    |
| 177          | Spain. pleistocene  | 0.0634                           | 25363 [8946-92826]                                | 8511 [3002-31150]                                   | 0.0636                           | 25459 [9418-109411]                               | 8543 [3160-36715]                                   |
| 177          | Spain. ancient      | 0.0758                           | 30306 [15082-63219]                               | 10170 [5061-21214]                                  | 0.0708                           | 28331 [14994-63438]                               | 9507 [5032-21288]                                   |
| 177          | Europe. present     | 0.0510                           | 20396 [9039-48019]                                | 6844 [3033-16114]                                   | 0.0459                           | 18364 [8954-47156]                                | 6162 [3005-15824]                                   |
| 177          | Europe. holocene    | 0.0695                           | 27813 [12776-64051]                               | 9333 [4287-21494]                                   | 0.0645                           | 25816 [12659-67268]                               | 8663 [4248-22573]                                   |
| 177          | Europe. pleistocene | 0.0845                           | 33801 [10801-150068]                              | 11343 [3624-50358]                                  | 0.0893                           | 35734 [11446-179402]                              | 11991 [3841-60202]                                  |
| 177          | Europe. ancient     | 0.0873                           | 34902 [17345-71909]                               | 11712 [5821-24131]                                  | 0.0829                           | 33176 [17205-71534]                               | 11133 [5773-24005]                                  |
| <b>Short</b> |                     |                                  |                                                   |                                                     |                                  |                                                   |                                                     |
| 114          | Spain. present      | 0.0115 (3.1%)                    | 4615 [1892-10582]                                 | 1549 [635-3551]                                     | 0.0100 (30%)                     | 4011 [1448-9536]                                  | 1346 [486-3200]                                     |
| 115          | Spain. holocene     | 0.0345 (5.4%)                    | 13780 [5185-34784]                                | 4624 [1740-11673]                                   | 0.0312 (56%)                     | 12475 [6315-31934]                                | 4186 [1784-10716]                                   |
| 115          | Spain. pleistocene  | 0.0751                           | 30033 [9742-114701]                               | 10078 [3269-38490]                                  | 0.0703                           | 28138 [10116-123453]                              | 9442 [3395-41427]                                   |
| 115          | Spain. ancient      | 0.0954                           | 38156 [18378-77050]                               | 12804 [6167-25856]                                  | 0.0794                           | 31774 [17947-75367]                               | 10662 [6022-25291]                                  |
| 115          | Europe. present     | 0.0577                           | 23092 [9499-57628]                                | 7749 [3188-19338]                                   | 0.0506                           | 20223 [9714-60021]                                | 6786 [3260-20141]                                   |
| 115          | Europe. holocene    | 0.0852                           | 34097 [14527-83593]                               | 11442 [4875-28051]                                  | 0.0831                           | 33228 [14420-85677]                               | 11150 [4839-28751]                                  |
| 115          | Europe. pleistocene | 0.0862                           | 34471 [10087-161310]                              | 11568 [3385-54131]                                  | 0.0816                           | 32656 [10650-192942]                              | 10958 [3574-64746]                                  |
| 115          | Europe. ancient     | 0.1063                           | 42508 [20381-92200]                               | 14265 [6839-30940]                                  | 0.1003                           | 40121 [18823-81444]                               | 13463 [6317-27330]                                  |

L, length of the dataset (in nucleotides); Ne, effective size; MLE, Most Likely Estimate (Maximum of Likelihood analysis); MPE, Most Probable Estimate (Bayesian analysis). The percentages in parentheses refer to the possible reduction in effective size between successive time periods in the Spanish population. The numbers between brackets refer to the 95% confidence range for the different effective sizes estimated. Two mutation rates were used here (see *Materials and Methods*) after conversion in percentage mutations per site per generation. Models of molecular evolution: F84 with Gamma correction (alpha-shape parameter = 0.75 and 0.289 for the short and long datasets, respectively) and 47.806 (and 70.209) as transition/transversion ratio.
