# Supplementary material
Source: PubMed Central journal article supplement (PMC2278212)
Supplement: pnas_0712223105_3.pdf [file pnas_0712223105_3.pdf]

**Table 4. Proportion of simulations (of 1,000) that lead to a shift in Gene diversity equal to or even greater than the one observed in the Iberian brown bear long dataset between the different time periods**

| Ne     | $\mu = 29.8\%$ subst./MY |                      | $\mu = 10.0\%$ subst./MY |                      |
|--------|--------------------------|----------------------|--------------------------|----------------------|
|        | Holocene/Modern          | Pleistocene/Holocene | Holocene/Modern          | Pleistocene/Holocene |
| 100    | <b>0.157</b>             | <b>0.507</b>         | <b>0.051</b>             | <b>0.551</b>         |
| 500    | <b>0.097</b>             | <b>0.321</b>         | <b>0.083</b>             | <b>0.426</b>         |
| 1,000  | 0.045                    | <b>0.208</b>         | <b>0.060</b>             | <b>0.393</b>         |
| 2,000  | 0.019                    | <b>0.098</b>         | 0.031                    | <b>0.248</b>         |
| 5,000  | 0.000                    | 0.018                | 0.010                    | <b>0.122</b>         |
| 10,000 | 0.000                    | 0.000                | 0.001                    | 0.035                |
| 15,000 | 0.000                    | 0.000                | 0.000                    | 0.013                |
| 20,000 | 0.000                    | 0.000                | 0.000                    | 0.004                |
| 25,000 | 0.000                    | 0.000                | 0.000                    | 0.006                |
| 30,000 | 0.000                    | 0.000                | 0.000                    | 0.001                |
| 35,000 | 0.000                    | 0.000                | 0.000                    | 0.000                |
| 40,000 | 0.000                    | 0.000                | 0.000                    | 0.000                |
| 45,000 | 0.000                    | 0.000                | 0.000                    | 0.000                |

The simulations have been conducted for the large data set (177 nt) over a large space of possible effective size values, assuming (i) no demographic change over time, (ii) two possible mutation rates, and (iii) the age of the sample Asieko at 80 KY. Frequencies superior to 0.05 are shown in red.
