# Supplementary material
Source: PubMed Central journal article supplement (PMC2278212)
Supplement: pnas_0712223105_7.pdf [file pnas_0712223105_7.pdf]

**Table 8. Proportion of simulations (of 1,000) that lead to a shift in gene diversity equal to or even greater than the one observed in the Iberian brown bear large dataset between the different time periods**

| Ne     | $\mu = 29.8\%$ subst./MY |                      |                    | $\mu = 10.0\%$ subst./MY |                      |                    |
|--------|--------------------------|----------------------|--------------------|--------------------------|----------------------|--------------------|
|        | Holocene/Modern          | Pleistocene/Holocene | Pleistocene/Modern | Holocene/Modern          | Pleistocene/Holocene | Pleistocene/Modern |
| 100    | 0.142                    | 0.715                | 0.110              | 0.048                    | 0.625                | 0.032              |
| 500    | 0.126                    | 0.446                | 0.102              | 0.083                    | 0.491                | 0.065              |
| 1,000  | 0.062                    | 0.294                | 0.046              | 0.050                    | 0.444                | 0.067              |
| 2,000  | 0.007                    | 0.113                | 0.004              | 0.044                    | 0.319                | 0.042              |
| 5,000  | 0.000                    | 0.014                | 0.000              | 0.006                    | 0.152                | 0.004              |
| 10,000 | 0.000                    | 0.000                | 0.000              | 0.001                    | 0.044                | 0.000              |
| 15,000 | 0.000                    | 0.000                | 0.000              | 0.000                    | 0.021                | 0.000              |
| 20,000 | 0.000                    | 0.000                | 0.000              | 0.000                    | 0.006                | 0.000              |
| 25,000 | 0.000                    | 0.000                | 0.000              | 0.000                    | 0.006                | 0.000              |
| 30,000 | 0.000                    | 0.000                | 0.000              | 0.000                    | 0.002                | 0.000              |
| 35,000 | 0.000                    | 0.000                | 0.000              | 0.000                    | 0.001                | 0.000              |
| 40,000 | 0.000                    | 0.000                | 0.000              | 0.000                    | 0.001                | 0.000              |
| 45,000 | 0.000                    | 0.000                | 0.000              | 0.000                    | 0.000                | 0.000              |

Same analyses as for SI Table 2 but assuming the age of the sample Asiako at 40 KY. Frequencies superior to 0.05 are shown in red.
