# Supplementary material
Source: PubMed Central journal article supplement (PMC2278212)
Supplement: pnas_0712223105_9.pdf [file pnas_0712223105_9.pdf]

### Dataset 1. Twenty new fossil and subfossil specimens

| Sample ID           | Extraction code | Site name             | Locality in Spain | C <sup>14</sup> date B.P. | Accession number |
|---------------------|-----------------|-----------------------|-------------------|---------------------------|------------------|
| Villavieja          | Ua1             | Villavieja            | Castellón         | Holocene                  | EU400208         |
| Maza Cotina         | Ua2             | Maza Cotina           | Burgos            | 1,695 ± 35                | EU400211         |
| La Paloma           | Ua3             | La Paloma             | Asturias          | 6,145 ± 160               | EU400210         |
| Aketegi             | Ua4             | Aketegi II            | País Vasco        | 1,640 ± 35                | EU400209         |
| Hortiguela          | Ua5             | Cueva de Tresmajuelos | Burgos            | 6,325 ± 5 0               | EU400179         |
| Vb88T6              | Ua6             | Valdegoba             | Burgos            | ~ 80,000                  | EU400182         |
| VbL13               | Ua7             | Valdegoba             | Burgos            | ~ 80,000                  | EU400183         |
| Vdgba               | Ua8             | Valdegoba             | Burgos            | ~ 80,000                  | EU400181         |
| Gal                 | Ua9             | Cueva Do Eixe         | Galicia           |                           | EU400177         |
| Asieko              | Ua10            | Arlanpe               | País Vasco        | Pleistocene*              | EU400180         |
| Machorras           | Ua11            | Cuevas del Somo       | Burgos            | Holocene <sup>†</sup>     | EU400176         |
| O.Pal               | Ua12            | Palencia              | Palencia          | Holocene <sup>†</sup>     | EU400178         |
| PEU                 | Ua13            | Tielve                | Asturias          | ~40YA                     | EU400207         |
| <i>CAO 86</i>       | Ua14            | A Valiña              | Galicia           |                           |                  |
| <i>CAO 15</i>       | Ua15            | A Valiña              | Galicia           |                           |                  |
| <i>PVD3 105</i>     | Ua16            | Pinilla               | Madrid            |                           |                  |
| <i>PVY 813</i>      | Ua17            | Pinilla               | Madrid            |                           |                  |
| <i>PVD3 270</i>     | Ua18            | Pinilla               | Madrid            |                           |                  |
| <i>PV 2433</i>      | Ua19            | Pinilla               | Madrid            |                           |                  |
| Vb9184 <sup>‡</sup> | Ua20            | Valdegoba             | Burgos            | ~ 80,000                  |                  |

YA, years ago. Samples that did not yield DNA are shown in italics.

\*Two extreme dates (40KY or 80KY) compatible with the information about the excavation context have been assigned for serial coalescent simulations.

<sup>†</sup>Inferred as the average of absolute ages of the specimens belonging to the same time period for serial coalescent simulations.

<sup>‡</sup>Sample identified as cave bear.
