# Supplementary material
Source: PubMed Central journal article supplement (PMC2278212)
Supplement: pnas_0712223105_10.pdf [file pnas_0712223105_10.pdf]

## Dataset 2. Long dataset

| Long dataset number | Sample name | Haplotype | Age                      | Geographic location |
|---------------------|-------------|-----------|--------------------------|---------------------|
| 1                   | C.Motas33_2 | 1         | -----                    | Spain               |
|                     | Machorras   |           | -----                    |                     |
|                     | Galicia     |           | -----                    |                     |
|                     | GEE         |           | 5,380 ± 45 B.P.          |                     |
|                     | Hortigüela  |           | 6,325 ± 50 B.P.          |                     |
|                     | Vallecampo  |           | 7,500 ± 55 B.P.          |                     |
| 2                   | Asturias    | 2         | -----                    | Spain               |
| 3                   | Palencia    | 3         | -----                    | Spain               |
| 4                   | HEM         | 4         | 350 ± 40 B.P.            | Spain               |
| 5                   | C.motas33_1 | 5         | 4,624 ± 45 B.P.          | Spain               |
| 6                   | Atapuerca   | 6         | 17,440 ± 425<br>B.P.     | Spain               |
|                     | VALD2       |           | 90,000 B.P.              |                     |
| 7                   | Asieko      | 7         | Mid-Lower<br>Paleolithic | Spain               |
| 8                   | Vb88T6      | 8         | 90,000                   | Spain               |
| 9                   | VbL13       | 9         | 90,000                   | Spain               |
| 10                  | A12         | 10        | XII-XIV Century          | Germany             |
|                     | REMANIE     |           | 3,445 ± 40 B.P.          | France              |
|                     | A9          |           | 5,210 ± 35 B.P.          | Germany             |
|                     | Slovenia    |           | Modern                   | Italy/Balkans       |
| 11                  | MV4-K3      | 11        | 1,570 ± 35 B.P.          | France              |
|                     | MV4-162     |           | 17,909 ± 55 B.P.         |                     |
|                     | Pyrenees    |           | Modern                   |                     |
| 12                  | A3          | 12        | 1,665 ± 35 B.P.          | Germany             |
|                     | Bulgaria    |           | Modern                   | Italy/Balkans       |
| 13                  | A5          | 13        | 1,770 ± 35 B.P.          | Germany             |
|                     | Russia1     |           | Modern                   | Russia              |
|                     | Russia      |           | Modern                   | Russia              |

| <b>Long dataset number</b> | <b>Sample name</b> | <b>Haplotype</b> | <b>Age</b>       | <b>Geographic location</b> |
|----------------------------|--------------------|------------------|------------------|----------------------------|
|                            | Russia2            |                  | Modern           | Russia                     |
| 14                         | MV4-204-48         | 14               | 1,750 ± 30 B.P.  | France                     |
| 15                         | MV4-1184           | 15               | 3,845 ± 40 B.P.  | France                     |
| 16                         | MV4-714            | 16               | 4,645 ± 40 B.P.  | France                     |
| 17                         | MV4-851            | 17               | 6,525 ± 50 B.P.  | France                     |
| 18                         | Scotland           | 18               | Holocene         | Scotland                   |
| 19                         | gbcm2              | 19               | 16,440 ± 65 B.P. | Italy/Balkans              |
| 20                         | Winden             | 20               | 39,940 B.P.      | Austria                    |
| 21                         | Ramesch            | 21               | 47,420 B.P.      | Austria                    |
| 22                         | Oso1               | 22               | Modern           | Spain                      |
|                            | oso2               |                  |                  |                            |
|                            | oso3               |                  |                  |                            |
|                            | Oso4               |                  |                  |                            |
|                            | Oso5               |                  |                  |                            |
|                            | Oso6               |                  |                  |                            |
|                            | Oso7               |                  |                  |                            |
|                            | Oso8               |                  |                  |                            |
|                            | Oso9               |                  |                  |                            |
|                            | Oso10              |                  |                  |                            |
|                            | Oso11              |                  |                  |                            |
|                            | Oso12              |                  |                  |                            |
|                            | Oso13              |                  |                  |                            |
|                            | Oso15              |                  |                  |                            |
|                            | Oso17              |                  |                  |                            |
|                            | Oso18              |                  |                  |                            |
|                            | Oso20              |                  |                  |                            |
|                            | Oso22              |                  |                  |                            |
|                            | Oso23              |                  |                  |                            |
|                            | Oso25              |                  |                  |                            |
|                            | Cantab1            |                  |                  |                            |
|                            | Cantab2            |                  |                  |                            |

| <b>Long dataset number</b> | <b>Sample name</b> | <b>Haplotype</b> | <b>Age</b> | <b>Geographic location</b> |
|----------------------------|--------------------|------------------|------------|----------------------------|
|                            | PEU2               |                  |            |                            |
| 23                         | Oso14              | 23               | Modern     | Spain                      |
| 24                         | Oso21              | 24               | Modern     | Spain                      |
| 25                         | Oso24              | 25               | Modern     | Spain                      |
| 26                         | Abruzzo            | 26               | Modern     | Italy/Balkans              |
| 27                         | Croatia            | 27               | Modern     | Italy/Balkans              |
| 28                         | Dalarna            | 28               | Modern     | Scandinavia                |
| 29                         | Greece             | 29               | Modern     | Italy/Balkans              |
| 30                         | Norway             | 30               | Modern     | Scandinavia                |
