# Supplementary material
Source: PubMed Central journal article supplement (PMC2278212)
Supplement: pnas_0712223105_11.pdf [file pnas_0712223105_11.pdf]

### Dataset 3. Short dataset

| Short dataset number | Sample name                                                                        | Haplotype | Age              | Geographic location |
|----------------------|------------------------------------------------------------------------------------|-----------|------------------|---------------------|
| 1                    | Norway                                                                             | Ua1       | Modern           | Scandinavia         |
| 2                    | Scotland                                                                           | Ua2       | Holocene         | Scotland            |
|                      | Dalarna                                                                            |           | Modern           | Scandinavia         |
| 3                    | Gbcm2                                                                              | Ua3       | 16,440 ± 65 B.P. | Italy/Balkans       |
| 4                    | Oso 1-13, 15,<br>17, 18, 20, 22,<br>23, 25,<br>Cantabria 1,<br>Cantabria 2,<br>PEU | Ua4       | Modern           | Spain               |
| 5                    | Palencia,                                                                          | Ua5       | -----            | Spain               |
|                      | Hem,                                                                               |           | 350 ± 40 B.P.    | Spain               |
|                      | Mv4-K3                                                                             |           | 1,570 ± 35 B.P.  | France              |
|                      | Mv4162                                                                             |           | 17,909 ± 55 B.P. | France              |
|                      | Pyrenees                                                                           |           | Modern           | France              |
| 6                    | C. Motas 33_2                                                                      | Ua6       | -----            | Spain               |
|                      | Machorras                                                                          |           | -----            |                     |
|                      | Galicia                                                                            |           | -----            |                     |
|                      | Hortigüela                                                                         |           | 6,325 ± 50 B.P.  |                     |
|                      | Gee                                                                                |           | 5,380 ± 45 B.P.  |                     |
|                      | Vallecampo                                                                         |           | 7,500 ± 55 B.P.  |                     |
|                      | Mazacotina                                                                         |           | 1,695 ± 35 B.P.  |                     |
| 7                    | C.motas 33_1                                                                       | Ua7       | 4,624 ± 45 B.P.  | Spain               |
| 8                    | Asturias                                                                           | Ua8       | -----            | Spain               |
| 9                    | Mv4-851                                                                            | Ua9       | 6,525 ± 50 B.P.  | France              |
| 10                   | Mv4-1184                                                                           | Ua10      | 3,845 ± 40 B.P.  | France              |
| 11                   | Mv4-714                                                                            | Ua11      | 4,645 ± 40 B.P.  | France              |
| 12                   | Mv4-204-48                                                                         | Ua12      | 1,750 ± 30 B.P.  | France              |
| 13                   | A12                                                                                | Ua13      | XII-XIV Century  | Germany             |

| <b>Short dataset number</b> | <b>Sample name</b> | <b>Haplotype</b> | <b>Age</b>               | <b>Geographic location</b> |
|-----------------------------|--------------------|------------------|--------------------------|----------------------------|
|                             | A9                 |                  | 5,210 ± 35 B.P.          | Germany                    |
|                             | Remanie            |                  | 3,445 ± 40 B.P.          | France                     |
|                             | Slovenia           |                  | Modern                   | Italy/Balkans              |
| 14                          | Abruzzo            | Ua14             | Modern                   | Italy/Balkans              |
| 15                          | La Paloma          | Ua15             | 6,145 ± 160 B.P.         | Spain                      |
|                             | Villavieja         |                  |                          |                            |
| 16                          | Bulgaria           | Ua16             | Modern                   | Italy/Balkans              |
|                             | A3                 |                  | 1,665 ± 35 B.P.          | Germany                    |
| 17                          | Greece             | Ua17             | Modern                   | Italy/Balkans              |
| 18                          | Atapuerca          | Ua18             | 17,440 ± 425 B.P.        | Spain                      |
|                             | Vald               |                  | 90,000 B.P.              |                            |
| 19                          | Winden             | Ua19             | 39,940 B.P.              | Austria                    |
| 20                          | A5                 | Ua20             | 1,770 ± 35 B.P.          | Germany                    |
|                             | Russia             |                  | Modern                   | Russia                     |
|                             | Russia1            |                  | Modern                   |                            |
|                             | Russia2            |                  | Modern                   |                            |
| 21                          | Croatia            | Ua21             | Modern                   | Italy/Balkans              |
| 22                          | Oso 14             | Ua22             | Modern                   | Spain                      |
| 23                          | Oso 21             | Ua23             | Modern                   | Spain                      |
| 24                          | Oso 24             | Ua24             | Modern                   | Spain                      |
| 25                          | VbL13              | Ua25             | 80,000                   | Spain                      |
| 26                          | Vb88T6             | Ua26             | 80,000                   | Spain                      |
| 27                          | Aketegi II         | Ua27             | 1,640 ± 35 B.P.          | Spain                      |
| 28                          | Ramesch            | Ua28             | 47,420 B.P.              | Austria                    |
| 29                          | Asieko             | Ua29             | Mid-Lower<br>Paleolithic | Spain                      |
