# Supplementary material
Source: PubMed Central journal article supplement (PMC2278212)
Supplement: pnas_0712223105_12.pdf [file pnas_0712223105_12.pdf]

**Dataset 4. Previously published mitochondrial DNA sequences**

| <b>Accession number</b> | <b>Site</b>                            | <b>Age</b>        |
|-------------------------|----------------------------------------|-------------------|
| AY082881                | Bear Cave (Scotland, United Kingdom)   | Late Holocene     |
| AJ809333                | Ramesch                                | 47,420 B.P.       |
| AJ809334                | Winden                                 | 39,940 B.P.       |
| X75871                  | Norway                                 | Present           |
| X75868                  | Dalarna, Sweden                        | Present           |
| X75865                  | Cantabria, Spain                       | Present           |
| X75878                  | Pyrenees, France                       | Present           |
| X75877                  | Slovenia                               | Present           |
| X75867                  | Croatia                                | Present           |
| X75864                  | Bulgaria                               | Present           |
| X755870                 | Greece                                 | Present           |
| X75862                  | Abruzzo, Italy                         | Present           |
| X75874                  | Russia                                 | Present           |
| X75875                  | Russia1                                | Present           |
| X75876                  | Russia2                                | Present           |
| EF488487                | Cuevas del Somo (Burgos, Spain)        | 7,500 ± 55 B.P.   |
| EF488502                | Cuevas del Somo (Burgos, Spain)        | -----             |
| EF488503                | Cuevas del Somo (Burgos, Spain)        | 4,624 ± 45 B.P.   |
| EF488495                | Mont Ventoux (Vaucluse, France)        | 1,570 ± 35 B.P.   |
| EF488504                | Atapuerca-Cueva Mayor (Burgos, Spain)  | 17,440 ± 425 B.P. |
| EF488488                | Grotta Beatrice Cenci (Abruzzo, Italy) | 16,440 ± 65 B.P.  |
| EF488489                | Cantabria Cave (Cantabria, Spain)      | -----             |
| EF488490                | Cuevas del Somo (Burgos, Spain)        | 5,380 ± 45 B.P.   |
| EF488496                | Mont Ventoux (Vaucluse, France)        | 4,645 ± 40 B.P.   |
| EF488492                | Mont Ventoux (Vaucluse, France)        | 3,845 ± 40 B.P.   |
| EF488493                | Mont Ventoux (Vaucluse, France)        | 1,750 ± 30 B.P.   |

| <b>Accession number</b> | <b>Site</b>                                | <b>Age</b>      |
|-------------------------|--------------------------------------------|-----------------|
| EF488491                | Mont Ventoux (Vaucluse, France)            | 1,790 ± 55 B.P. |
| EF488494                | Mont Ventoux (Vaucluse, France)            | 6,525 ± 50 B.P. |
| EF488505                | Mont Ventoux (Vaucluse, France)            | 3,445 ± 40 B.P. |
| EF488497                | Navacepeda (Avila, Spain)                  | 350 ± 40 B.P.   |
| EF488501                | Dienstedt (Thuringia, Germany)             | 1,665 ± 35 B.P. |
| EF488498                | Mühlberg (Thuringia, Germany)              | 1,770 ± 35 B.P. |
| EF488499                | Bad Frankenhausen (Thuringia, Germany)     | 5,210 ± 35 B.P. |
| EF488500                | Wysburg near Weisbach (Thuringia, Germany) | XII-XIV century |
| AY149273                | Balme a Collomb (France)                   | -----           |
| AY149271                | Cova Linares                               | -----           |
| AY149268                | Scladina                                   | -----           |

Ancient and modern brown bear sequences taken from GenBank database with their corresponding accession number, geographic location, and assigned age. Samples dated to B.P. correspond to uncalibrated radiocarbon years B.P.
