# Supplementary material
Source: PubMed Central journal article supplement (PMC2278212)

**A**

Change in Gene Diversity

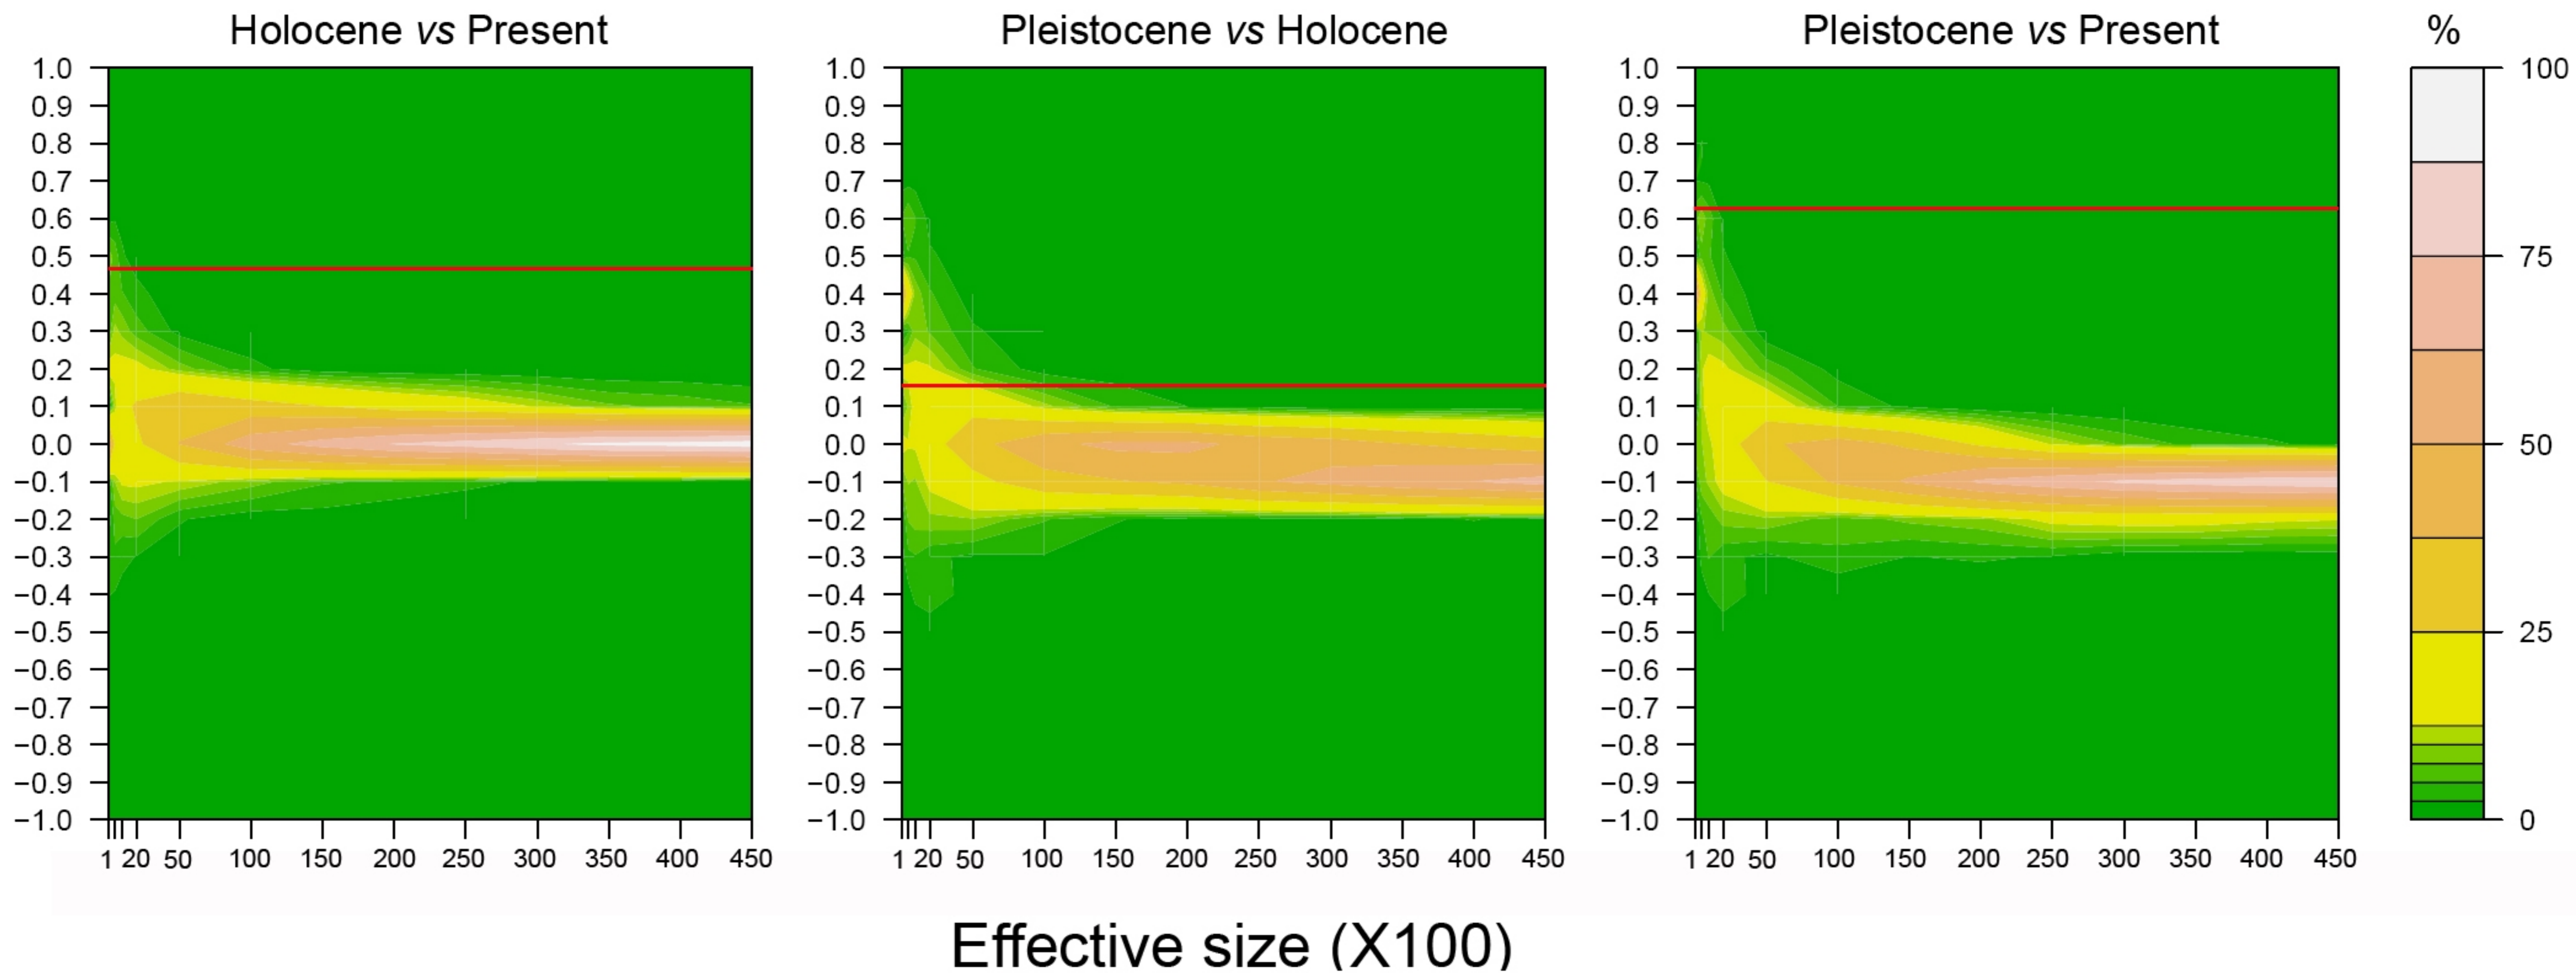**B**

Change in Gene Diversity

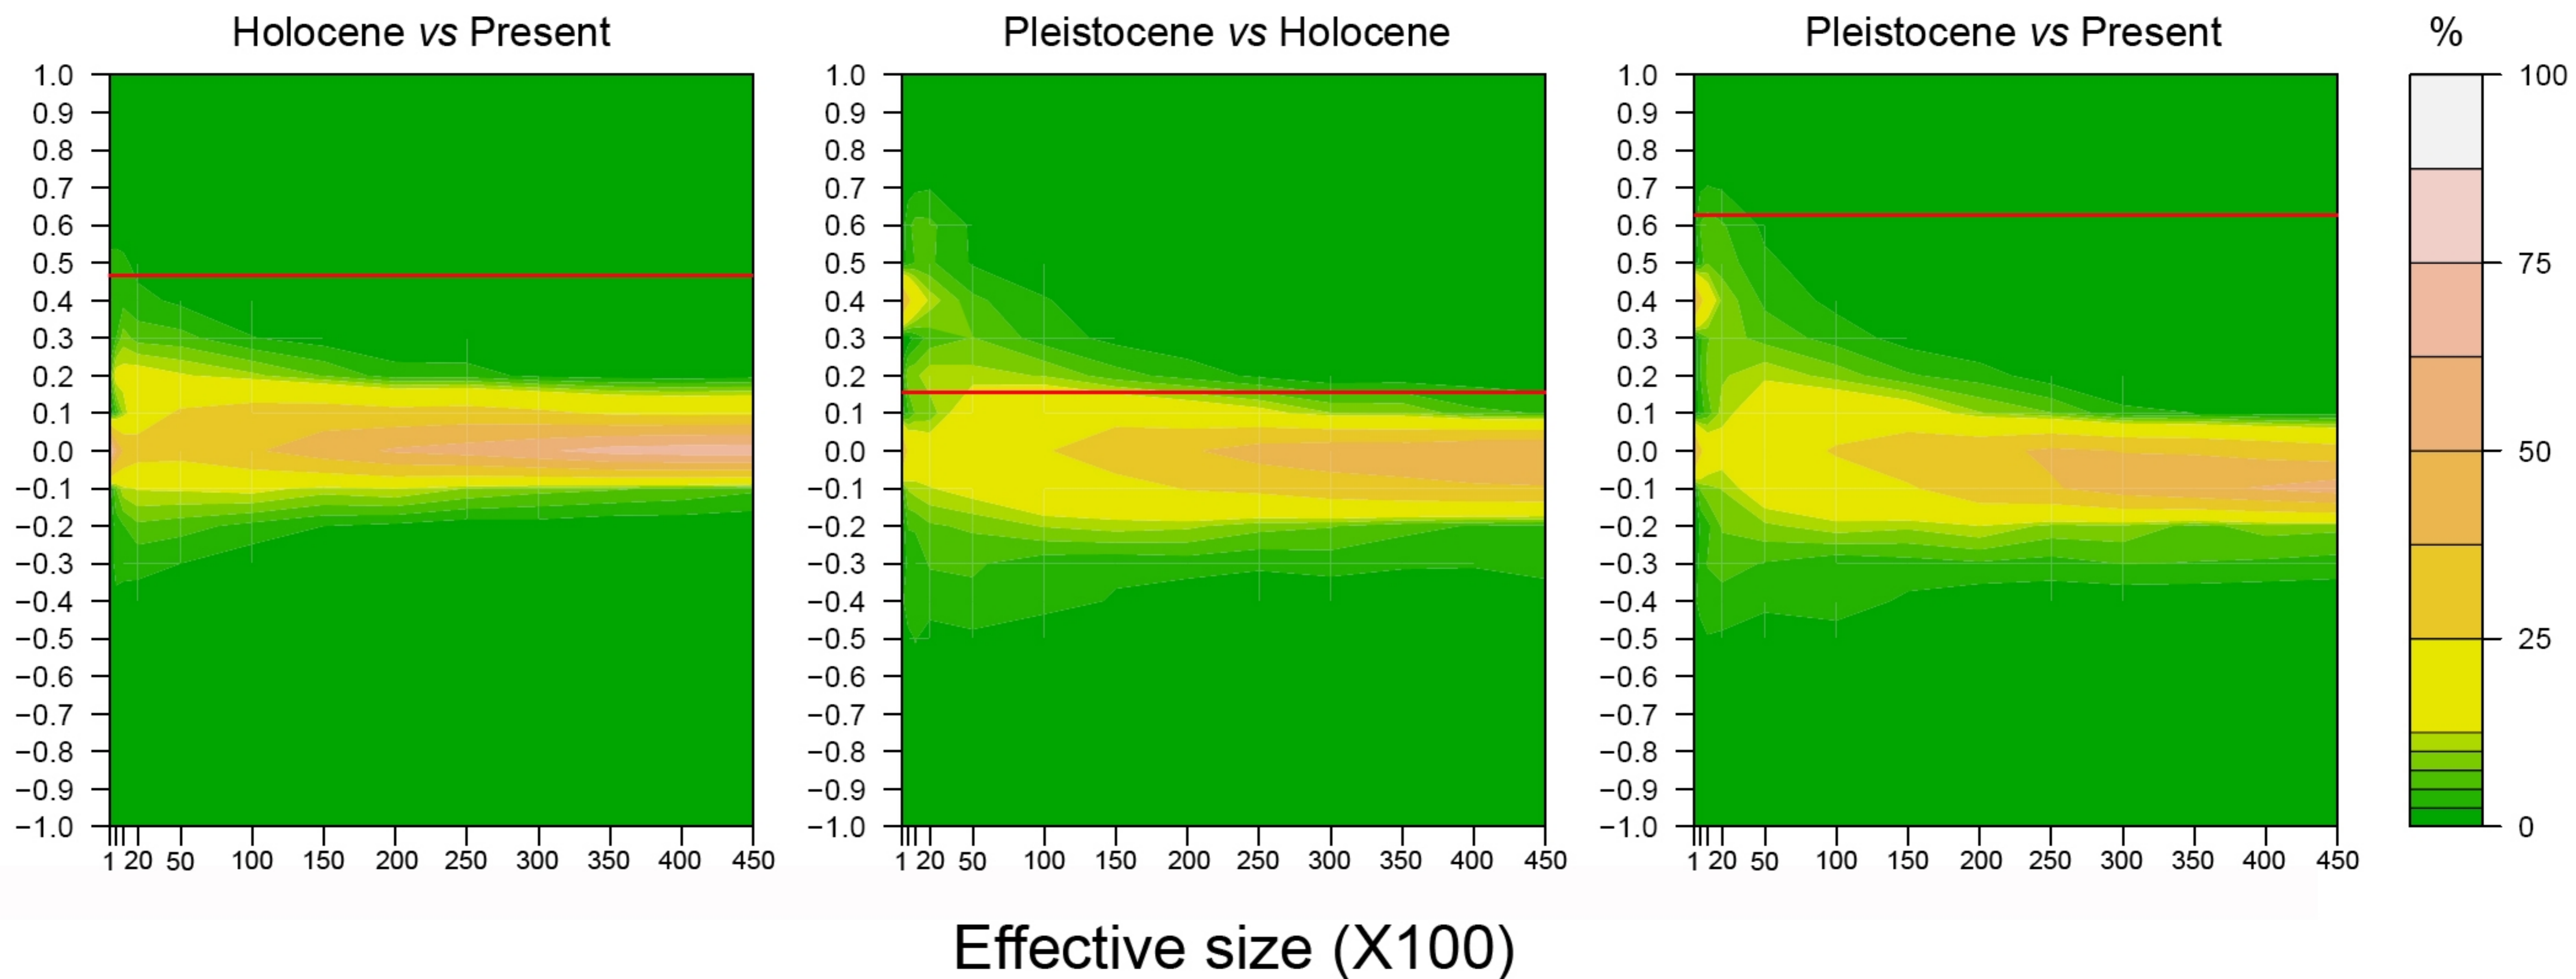

Supplement: pnas_0712223105_14.pdf [file pnas_0712223105_14.pdf]
